# Supplementary material for: Population Genetics of Manila Clam (Ruditapes philippinarum) in China Inferred from Microsatellite Markers
Source: MDPI journal article supplement (doi:10.3390/biology12040557), 2023-04-06
Supplement: s1 [file s1]

Supplementary Materials

# Population Genetics of Manila Clam (*Ruditapes philippinarum*) in China Inferred from Microsatellite Markers

Sichen Zheng, Tianshi Zhang, Kang Tu, Li Li, Zhihong Liu, Biao Wu, Liqing Zhou and Xiujun Sun

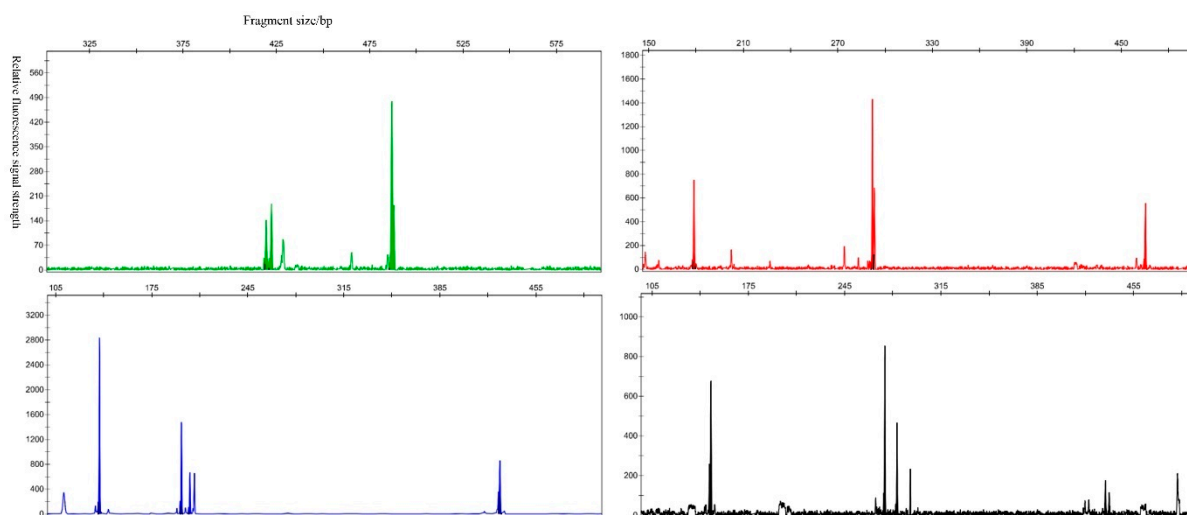

**Figure S1.** SSR profiles generated on a capillary sequencer for a single sample. Green color, Hex fluorescence; Red color, Rox fluorescence; Blue color, Fam fluorescence; Black color, Tamra fluorescence.

**Table S1. Genetic diversity parameters of thirteen *R. philippinarum* populations.**

| Locus                   | Parameter       | CZ      | LZ      | LJ      | NB      | SY      | RZ      | ZZ      | BH      | QD      | HY      | DG      | ZH      | XY      | Total |
|-------------------------|-----------------|---------|---------|---------|---------|---------|---------|---------|---------|---------|---------|---------|---------|---------|-------|
| Rpt83                   | N               | 6       | 7       | 8       | 9       | 5       | 8       | 6       | 5       | 5       | 5       | 6       | 7       | 10      | 14    |
|                         | A <sub>r</sub>  | 3.6     | 4.3     | 4.3     | 4.5     | 3.3     | 4.3     | 3.6     | 3.1     | 3.5     | 4.1     | 4.6     | 4.1     | 5.5     | 5.2   |
|                         | G <sub>D</sub>  | 0.596   | 0.774   | 0.647   | 0.753   | 0.633   | 0.727   | 0.621   | 0.505   | 0.610   | 0.741   | 0.817   | 0.709   | 0.848   |       |
|                         | H <sub>o</sub>  | 0.419   | 0.333   | 0.138   | 0.250   | 0.286   | 0.414   | 0.292   | 0.167   | 0.286   | 0.545   | 0.385   | 0.087   | 0.353   | 0.304 |
|                         | H <sub>e</sub>  | 0.593   | 0.766   | 0.638   | 0.744   | 0.625   | 0.721   | 0.614   | 0.495   | 0.602   | 0.732   | 0.800   | 0.696   | 0.840   | 0.682 |
|                         | F <sub>is</sub> | 0.296   | 0.569*  | 0.787*  | 0.668*  | 0.549*  | 0.431*  | 0.531*  | 0.670*  | 0.531*  | 0.264   | 0.529*  | 0.877*  | 0.584*  |       |
|                         | P               | 0.0944  | 0.0000* | 0.0000* | 0.0000* | 0.0322  | 0.0000* | 0.0000* | 0.0048  | 0.0029* | 0.1461  | 0.1229  | 0.0000* | 0.0000* |       |
| Rpt32                   | N               | 6       | 4       | 6       | 7       | 6       | 5       | 7       | 8       | 6       | 7       | 4       | 4       | 6       | 9     |
|                         | A <sub>r</sub>  | 4.1     | 3.0     | 4.2     | 3.9     | 3.8     | 2.6     | 3.8     | 4.0     | 3.4     | 4.2     | 3.2     | 2.7     | 3.7     | 4.2   |
|                         | G <sub>D</sub>  | 0.748   | 0.514   | 0.748   | 0.687   | 0.703   | 0.539   | 0.693   | 0.713   | 0.664   | 0.702   | 0.599   | 0.584   | 0.698   |       |
|                         | H <sub>o</sub>  | 0.464   | 0.563   | 0.467   | 0.500   | 0.533   | 0.400   | 0.677   | 0.571   | 0.276   | 0.632   | 0.250   | 0.296   | 0.333   | 0.459 |
|                         | H <sub>e</sub>  | 0.743   | 0.515   | 0.743   | 0.684   | 0.701   | 0.536   | 0.693   | 0.710   | 0.658   | 0.700   | 0.590   | 0.579   | 0.692   | 0.657 |
|                         | F <sub>is</sub> | 0.379*  | -0.094  | 0.376*  | 0.272   | 0.242   | 0.257   | 0.022   | 0.199   | 0.585*  | 0.100   | 0.582*  | 0.493*  | 0.522*  |       |
|                         | P               | 0.0000* | 0.3250  | 0.0002* | 0.0002* | 0.3978  | 0.6469  | 0.3929  | 0.5102  | 0.0021* | 0.0019* | 0.0012* | 0.0763  | 0.0000* |       |
| Rpt67                   | N               | 5       | 8       | 6       | 6       | 6       | 8       | 6       | 9       | 5       | 6       | 5       | 9       | 5       | 14    |
|                         | A <sub>r</sub>  | 3.4     | 4.8     | 3.6     | 3.4     | 3.2     | 4.5     | 3.2     | 4.1     | 3.3     | 3.9     | 3.0     | 4.5     | 3.6     | 4.1   |
|                         | G <sub>D</sub>  | 0.660   | 0.790   | 0.682   | 0.654   | 0.575   | 0.760   | 0.634   | 0.721   | 0.643   | 0.715   | 0.596   | 0.759   | 0.692   |       |
|                         | H <sub>o</sub>  | 0.407   | 0.419   | 0.429   | 0.500   | 0.433   | 0.464   | 0.484   | 0.259   | 0.542   | 0.667   | 0.444   | 0.538   | 0.306   | 0.453 |
|                         | H <sub>e</sub>  | 0.655   | 0.784   | 0.677   | 0.651   | 0.573   | 0.755   | 0.631   | 0.712   | 0.641   | 0.714   | 0.592   | 0.755   | 0.686   | 0.679 |
|                         | F <sub>is</sub> | 0.382*  | 0.469*  | 0.371*  | 0.236   | 0.247   | 0.389*  | 0.237   | 0.640*  | 0.158   | 0.068   | 0.255   | 0.291   | 0.558*  |       |
|                         | P               | 0.0000* | 0.0000* | 0.0001* | 0.0022* | 0.0012* | 0.0540  | 0.0002* | 0.0000* | 0.0973  | 0.8358  | 0.0294  | 0.0007* | 0.0000* |       |
| Table 3. (continuation) |                 |         |         |         |         |         |         |         |         |         |         |         |         |         |       |
| Rpt105                  | N               | 9       | 8       | 7       | 9       | 6       | 5       | 5       | 6       | 4       | 8       | 4       | 5       | 7       | 16    |
|                         | A <sub>r</sub>  | 4.5     | 4.0     | 3.5     | 4.3     | 3.8     | 3.5     | 3.3     | 3.4     | 3.1     | 4.0     | 2.6     | 3.2     | 4.0     | 3.8   |
|                         | G <sub>D</sub>  | 0.728   | 0.662   | 0.573   | 0.708   | 0.635   | 0.641   | 0.641   | 0.647   | 0.586   | 0.675   | 0.521   | 0.548   | 0.732   |       |
|                         | H <sub>o</sub>  | 0.219   | 0.484   | 0.531   | 0.345   | 0.483   | 0.467   | 0.677   | 0.500   | 0.333   | 0.519   | 0.238   | 0.333   | 0.200   | 0.410 |
|                         | H <sub>e</sub>  | 0.720   | 0.659   | 0.572   | 0.701   | 0.633   | 0.638   | 0.641   | 0.644   | 0.580   | 0.672   | 0.515   | 0.544   | 0.723   | 0.634 |
|                         | F <sub>is</sub> | 0.699*  | 0.269   | 0.073   | 0.513*  | 0.240   | 0.272   | -0.057  | 0.227   | 0.431   | 0.232   | 0.543*  | 0.392*  | 0.727*  |       |
|                         | P               | 0.0000* | 0.0002* | 0.4239  | 0.0001* | 0.0959  | 0.0108  | 0.2383  | 0.0009* | 0.0005* | 0.0347  | 0.0002* | 0.0040* | 0.0000* |       |

|                         |                 |         |         |         |         |         |         |         |         |         |         |         |         |         |       |
|-------------------------|-----------------|---------|---------|---------|---------|---------|---------|---------|---------|---------|---------|---------|---------|---------|-------|
| Rpt106                  | N               | 5       | 6       | 5       | 6       | 7       | 6       | 6       | 7       | 4       | 7       | 6       | 6       | 8       | 14    |
|                         | A <sub>r</sub>  | 3.7     | 3.4     | 3.5     | 4.3     | 4.6     | 3.8     | 3.4     | 3.9     | 4.0     | 4.8     | 4.6     | 4.4     | 4.8     | 5.5   |
|                         | G <sub>D</sub>  | 0.696   | 0.580   | 0.678   | 0.708   | 0.796   | 0.726   | 0.662   | 0.650   | 0.900   | 0.816   | 0.814   | 0.758   | 0.798   |       |
|                         | H <sub>o</sub>  | 0.594   | 0.156   | 0.065   | 0.069   | 0.387   | 0.464   | 0.107   | 0.103   | 0.000   | 0.412   | 0.417   | 0.250   | 0.231   | 0.250 |
|                         | H <sub>e</sub>  | 0.694   | 0.573   | 0.668   | 0.696   | 0.790   | 0.721   | 0.652   | 0.640   | 0.800   | 0.804   | 0.797   | 0.745   | 0.787   | 0.721 |
|                         | F <sub>is</sub> | 0.147   | 0.731*  | 0.905*  | 0.903*  | 0.514*  | 0.360*  | 0.838*  | 0.841*  | 1.000*  | 0.495*  | 0.488*  | 0.670*  | 0.711*  |       |
|                         | P               | 0.6132  | 0.0000* | 0.0000* | 0.0000* | 0.0000* | 0.0000* | 0.0000* | 0.0000* | 0.0203  | 0.0001* | 0.1664  | 0.0000* | 0.0000* |       |
| Rpt100                  | N               | 5       | 6       | 4       | 4       | 6       | 6       | 5       | 3       | 5       | 4       | 6       | 6       | 6       | 9     |
|                         | A <sub>r</sub>  | 3.2     | 3.2     | 3.2     | 3.2     | 3.4     | 2.7     | 2.5     | 2.3     | 2.0     | 3.1     | 2.5     | 3.1     | 3.8     | 3.2   |
|                         | G <sub>D</sub>  | 0.567   | 0.469   | 0.585   | 0.531   | 0.584   | 0.359   | 0.416   | 0.335   | 0.196   | 0.511   | 0.305   | 0.526   | 0.660   |       |
|                         | H <sub>o</sub>  | 0.483   | 0.563   | 0.645   | 0.581   | 0.656   | 0.375   | 0.516   | 0.387   | 0.207   | 0.643   | 0.292   | 0.357   | 0.816   | 0.502 |
|                         | H <sub>e</sub>  | 0.566   | 0.471   | 0.586   | 0.531   | 0.585   | 0.359   | 0.417   | 0.336   | 0.196   | 0.514   | 0.305   | 0.523   | 0.662   | 0.465 |
|                         | F <sub>is</sub> | 0.149   | -0.199  | -0.102  | -0.094  | -0.124  | -0.045  | -0.242  | -0.156  | -0.057  | -0.257  | 0.045   | 0.321   | -0.235  |       |
|                         | P               | 0.0001* | 0.9929  | 0.1316  | 0.7140  | 0.9904  | 0.9998  | 0.9579  | 0.6181  | 1.0000  | 0.3923  | 0.0000* | 0.0013* | 0.7304  |       |
| Table 3. (continuation) |                 |         |         |         |         |         |         |         |         |         |         |         |         |         |       |
| Rpt36                   | N               | 8       | 8       | 9       | 8       | 7       | 10      | 5       | 8       | 9       | 7       | 8       | 6       | 7       | 16    |
|                         | A <sub>r</sub>  | 4.3     | 4.9     | 4.5     | 4.9     | 4.4     | 5.1     | 3.5     | 4.6     | 4.9     | 4.8     | 3.7     | 4.0     | 4.6     | 4.7   |
|                         | G <sub>D</sub>  | 0.716   | 0.814   | 0.769   | 0.826   | 0.767   | 0.820   | 0.667   | 0.800   | 0.780   | 0.805   | 0.680   | 0.695   | 0.796   |       |
|                         | H <sub>o</sub>  | 0.516   | 0.469   | 0.688   | 0.594   | 0.625   | 0.625   | 0.906   | 0.594   | 0.828   | 0.679   | 0.875   | 0.724   | 0.525   | 0.665 |
|                         | H <sub>e</sub>  | 0.713   | 0.809   | 0.768   | 0.822   | 0.765   | 0.816   | 0.671   | 0.797   | 0.780   | 0.803   | 0.684   | 0.695   | 0.792   | 0.763 |
|                         | F <sub>is</sub> | 0.279*  | 0.424*  | 0.106   | 0.281*  | 0.185   | 0.237   | -0.358  | 0.258   | -0.062  | 0.157   | -0.286  | -0.043  | 0.340*  |       |
|                         | P               | 0.3037  | 0.0002* | 0.1909  | 0.1130  | 0.4389  | 0.0006  | 0.0275  | 0.0500  | 0.0005* | 0.0005  | 0.0000* | 0.8536  | 0.0000* |       |
| Rp-03                   | N               | 9       | 8       | 7       | 7       | 8       | 7       | 7       | 11      | 10      | 6       | 6       | 2       | 7       | 18    |
|                         | A <sub>r</sub>  | 5.1     | 4.7     | 4.5     | 4.8     | 4.8     | 4.0     | 4.3     | 4.8     | 4.7     | 3.5     | 3.9     | 2.0     | 4.3     | 4.5   |
|                         | G <sub>D</sub>  | 0.811   | 0.778   | 0.787   | 0.806   | 0.772   | 0.719   | 0.712   | 0.772   | 0.762   | 0.665   | 0.711   | 0.500   | 0.766   |       |
|                         | H <sub>o</sub>  | 0.531   | 0.516   | 0.567   | 0.500   | 0.813   | 0.656   | 0.906   | 0.875   | 0.897   | 0.750   | 0.958   | 0.966   | 0.775   | 0.747 |
|                         | H <sub>e</sub>  | 0.807   | 0.774   | 0.784   | 0.802   | 0.773   | 0.718   | 0.715   | 0.774   | 0.765   | 0.666   | 0.716   | 0.508   | 0.766   | 0.736 |
|                         | F <sub>is</sub> | 0.345*  | 0.337*  | 0.280*  | 0.380*  | -0.052  | 0.088   | -0.272  | -0.133  | -0.176  | -0.128  | -0.348  | -0.931  | -0.011  |       |
|                         | P               | 0.0000* | 0.0000* | 0.0242  | 0.0000* | 0.0003* | 0.3837  | 0.4073  | 0.9956  | 0.9160  | 0.2140  | 0.0300  | 0.0000* | 0.0000* |       |
| Asari16                 | N               | 4       | 9       | 6       | 3       | 7       | 6       | 8       | 3       | 4       | 3       | 4       | 5       | 5       | 16    |
|                         | A <sub>r</sub>  | 2.2     | 5.2     | 2.5     | 1.7     | 3.1     | 3.2     | 2.9     | 1.7     | 1.7     | 2.3     | 2.6     | 3.0     | 2.6     | 3.3   |
|                         | G <sub>D</sub>  | 0.310   | 0.823   | 0.315   | 0.149   | 0.451   | 0.604   | 0.384   | 0.153   | 0.135   | 0.528   | 0.405   | 0.602   | 0.370   |       |
|                         | H <sub>o</sub>  | 0.355   | 0.719   | 0.188   | 0.094   | 0.406   | 0.781   | 0.438   | 0.161   | 0.069   | 0.821   | 0.391   | 1.000   | 0.303   | 0.440 |

|                         |                 |         |         |         |        |         |        |         |         |         |         |         |         |         |       |
|-------------------------|-----------------|---------|---------|---------|--------|---------|--------|---------|---------|---------|---------|---------|---------|---------|-------|
|                         | He              | 0.310   | 0.821   | 0.313   | 0.148  | 0.450   | 0.607  | 0.384   | 0.153   | 0.134   | 0.533   | 0.405   | 0.609   | 0.369   | 0.403 |
|                         | F <sub>is</sub> | -0.146  | 0.126   | 0.404*  | 0.372  | 0.098   | -0.293 | -0.141  | -0.056  | 0.489   | -0.556  | 0.034   | -0.662  | 0.182   |       |
|                         | P               | 0.9632  | 0.0070  | 0.0019* | 0.0720 | 0.0007* | 0.0000 | 1.0000  | 0.9711  | 0.0001* | 0.0000* | 0.4281  | 0.0012* | 0.0000* |       |
| Table 3. (continuation) |                 |         |         |         |        |         |        |         |         |         |         |         |         |         |       |
| Rp-07                   | N               | 5       | 5       | 6       | 5      | 6       | 5      | 5       | 4       | 4       | 4       | 5       | 3       | 5       | 12    |
|                         | A <sub>r</sub>  | 3.2     | 2.7     | 3.3     | 3.3    | 2.9     | 2.4    | 3.1     | 2.6     | 2.6     | 2.6     | 2.6     | 2.4     | 2.9     | 3.2   |
|                         | G <sub>D</sub>  | 0.552   | 0.385   | 0.477   | 0.553  | 0.442   | 0.400  | 0.498   | 0.540   | 0.567   | 0.570   | 0.473   | 0.445   | 0.585   |       |
|                         | H <sub>o</sub>  | 0.438   | 0.125   | 0.250   | 0.688  | 0.469   | 0.500  | 0.625   | 0.719   | 0.931   | 0.857   | 0.500   | 0.586   | 0.550   | 0.557 |
|                         | He              | 0.550   | 0.381   | 0.474   | 0.556  | 0.442   | 0.402  | 0.500   | 0.543   | 0.574   | 0.575   | 0.473   | 0.447   | 0.584   | 0.500 |
|                         | F <sub>is</sub> | 0.207   | 0.675*  | 0.476*  | -0.242 | -0.060  | -0.249 | -0.255  | -0.330  | -0.642  | -0.053  | -0.057  | -0.319  | 0.060   |       |
|                         | P               | 0.0000* | 0.0000* | 0.0000* | 0.5222 | 0.9998  | 0.9652 | 0.7615  | 0.0000* | 0.0011* | 0.0001* | 0.0000* | 0.1728  | 0.0243  |       |
| Rpt23                   | N               | 9       | 7       | 7       | 6      | 9       | 8      | 5       | 7       | 6       | 6       | 6       | 3       | 6       | 12    |
|                         | A <sub>r</sub>  | 5.0     | 4.7     | 4.6     | 4.5    | 5.1     | 4.7    | 3.9     | 4.1     | 3.9     | 3.7     | 4.3     | 3.4     | 4.6     | 4.7   |
|                         | G <sub>D</sub>  | 0.811   | 0.801   | 0.800   | 0.791  | 0.820   | 0.805  | 0.721   | 0.748   | 0.720   | 0.722   | 0.750   | 0.586   | 0.801   |       |
|                         | H <sub>o</sub>  | 0.889   | 0.500   | 0.844   | 0.750  | 0.875   | 0.781  | 0.938   | 0.781   | 0.931   | 0.929   | 0.625   | 0.679   | 0.850   | 0.798 |
|                         | He              | 0.813   | 0.797   | 0.801   | 0.790  | 0.821   | 0.805  | 0.725   | 0.749   | 0.724   | 0.725   | 0.747   | 0.588   | 0.801   | 0.760 |
|                         | F <sub>is</sub> | -0.096  | 0.376*  | -0.055  | 0.052  | -0.067  | 0.030  | -0.300  | -0.044  | -0.293  | -0.287  | 0.167   | -0.158  | -0.062  |       |
|                         | P               | 0.0416  | 0.0041* | 0.9197  | 0.6149 | 0.4788  | 0.8183 | 0.0011* | 0.3589  | 0.0109  | 0.3242  | 0.1659  | 0.0002* | 0.3430  |       |
| All                     | N               | 6.5     | 6.9     | 6.5     | 6.4    | 6.6     | 6.7    | 5.9     | 6.5     | 5.6     | 5.7     | 5.5     | 5.1     | 6.5     |       |
|                         | A <sub>r</sub>  | 3.8     | 4.1     | 3.8     | 3.9    | 3.8     | 3.7    | 3.4     | 3.5     | 3.4     | 3.7     | 3.4     | 3.3     | 4       |       |
|                         | G <sub>D</sub>  | 0.654   | 0.672   | 0.642   | 0.651  | 0.653   | 0.645  | 0.604   | 0.599   | 0.597   | 0.677   | 0.606   | 0.61    | 0.704   |       |
|                         | H <sub>o</sub>  | 0.483   | 0.441   | 0.437   | 0.443  | 0.542   | 0.539  | 0.597   | 0.465   | 0.482   | 0.678   | 0.489   | 0.529   | 0.476   | 0.508 |
|                         | He              | 0.651   | 0.668   | 0.639   | 0.648  | 0.651   | 0.644  | 0.604   | 0.596   | 0.587   | 0.676   | 0.602   | 0.608   | 0.700   | 0.636 |
|                         | F <sub>is</sub> | 0.261   | 0.344   | 0.319   | 0.320  | 0.169   | 0.165  | 0.012   | 0.223   | 0.193   | 0.000   | 0.194   | 0.133   | 0.323   |       |

Note: N, number of alleles; A<sub>r</sub>, allelic richness; G<sub>D</sub>, gene diversity; H<sub>o</sub>, the observed heterozygosity; H<sub>e</sub>, the expected heterozygosity; F<sub>is</sub>, inbreeding coefficient, “\*” indicates significant departure from Hardy-Weinberg equilibrium after Bonferroni correction ( $P < 0.005$ ).

| Table S2. Genetic differentiations and gene flow of thirteen <i>R. philippinarum</i> populations at different loci |                 |                 |                 |                |
|--------------------------------------------------------------------------------------------------------------------|-----------------|-----------------|-----------------|----------------|
| Locus                                                                                                              | F <sub>st</sub> | F <sub>it</sub> | F <sub>is</sub> | N <sub>m</sub> |
| Rpt83                                                                                                              | 0.1443          | 0.6328          | 0.5708          | 1.4821         |
| Rpt32                                                                                                              | 0.0990          | 0.3720          | 0.3031          | 2.2765         |
| Rpt67                                                                                                              | 0.0412          | 0.3725          | 0.3455          | 5.8168         |
| Rpt105                                                                                                             | 0.0360          | 0.3780          | 0.3547          | 6.6869         |
| Rpt106                                                                                                             | 0.0565          | 0.6614          | 0.6411          | 4.1745         |
| Rpt100                                                                                                             | 0.0398          | -0.0444         | -0.0877         | 6.0309         |
| Rpt36                                                                                                              | 0.0357          | 0.1741          | 0.1434          | 6.7442         |
| Rp-03                                                                                                              | 0.0394          | 0.0354          | -0.0042         | 6.0936         |
| Asari16                                                                                                            | 0.1729          | 0.1013          | -0.0865         | 1.1958         |
| Rp-07                                                                                                              | 0.0651          | -0.0303         | -0.1021         | 3.5887         |
| Rpt23                                                                                                              | 0.0376          | -0.0096         | -0.0491         | 6.3996         |
| ALL                                                                                                                | 0.0663          | 0.2396          | 0.1855          | 4.5900         |
| $N_m = 0.25 \times (1 - F_{st}) / F_{st}$                                                                          |                 |                 |                 |                |
